# Supplementary material for: Elucidating the underlying toxic mechanisms of nanoplastics on zebrafish hematological and circulatory systems
Source: Royal Society of Chemistry journal article supplement (doi:10.1039/d4en00495g), 2024-01-01
Supplement: d4en00495g1.pdf [file d4en00495g1.pdf]

**Supplementary information**

**Elucidating the Underlying Toxic Mechanisms of Nanoplastics  
on Zebrafish Hematological and Circulatory Systems**

Dongzhi Gou<sup>a,#</sup>, Jiao-Yun Deng<sup>a,#</sup>, Qi-Ping Tang<sup>a,#</sup>, Jiajia Lu<sup>a</sup>, Li Bao<sup>a</sup>, Yiyun Liu<sup>a</sup>,  
De-Sheng Pei<sup>a,\*</sup>

*<sup>a</sup>School of Public Health, Chongqing Medical University, Chongqing 400016, China*

<sup>#</sup>Contributed equally to this work.

<sup>\*</sup>Corresponding author.

E-mail: peids@cqmu.edu.cn (D.S.P)

**Table S1. The temporal parameters of zebrafish exposure to PS-NPs, including the initiation and duration of exposure as well as the time point of sample collection.**

| <b>Initial exposure<br/>time point</b> | <b>exposure duration</b> | <b>Collect zebrafish<br/>time point</b> |
|----------------------------------------|--------------------------|-----------------------------------------|
| 0 hpf                                  | 12 hours                 | 12 hpf                                  |
| 12 hpf                                 | 14 hours                 | 26 hpf                                  |
| 12 hpf                                 | 18 hours                 | 30 hpf                                  |
| 24 hpf                                 | 24 hours                 | 48 hpf                                  |
| 24 hpf                                 | 35 hours                 | 59 hpf                                  |
| 24 hpf                                 | 48 hours                 | 72 hpf                                  |

**Table S2. Primers used in this study**

| <b>Genes</b>   | <b>Accession No.</b> | <b>Primer sequences (5'-3' F/R)</b>                                | <b>Size (bp)</b> | <b>Usage</b>       |
|----------------|----------------------|--------------------------------------------------------------------|------------------|--------------------|
| <i>nppa</i>    | NM_198800.3          | ACAGAGACCGAGAGGAAG<br>AGGGTGCTGGAAGACCCTAT                         | 166 bp           | Heart failure      |
| <i>nppb</i>    | NM_001327776.1       | CATGGGTGTTTTAAAGTTTCTCC<br>CTTCAATATTTGCCGCCTTTAC                  | 101 bp           | Heart failure      |
| <i>hol</i>     | NM_001127516.1       | GGA CT TGGAGCACTTCTTCGG<br>ATGCCCTTGTTTCCAGTCAGC                   | 216 bp           | Oxidative stress   |
| <i>keap1</i>   | NM_182864.2          | TGTGATCTGGTTCTGCATGTC<br>ACTCCTTGAAGTTGCTGGTG                      | 121 bp           | Oxidative stress   |
| <i>nrf2</i>    | NM_182889.1          | CACCCAACATGAATCAACTG<br>ATTTCCGCCATCTGATGTAAT                      | 137 bp           | Oxidative stress   |
| <i>apex1</i>   | NM_213421.2          | AATAAAGTGTTGGGTGTACGTG<br>CAGGAGGTGATCTTCATATTGG                   | 251 bp           | BER pathway        |
| <i>creb1</i>   | NM_200909.1          | AGGAGCGTGGAGAACCATAAA<br>GGCAGAGCCATCAGCGAC                        | 151 bp           | BER pathway        |
| <i>crem</i>    | XM_677932.9          | GGAACAACACCATCAGATCC<br>CCTGAGTGATTGCAATGTACTG                     | 226 bp           | BER pathway        |
| <i>p62</i>     | NM_001312913.1       | CCTGGGTTTCCGTTCACT<br>TACTTTGGTCCGCTTTCC                           | 564 bp           | Mitophagy          |
| <i>pink1</i>   | NM_001008628.1       | GGGAGTGGATCATCTGTGC<br>TCTGCCATCTGGACCTTGT                         | 519 bp           | Mitophagy          |
| <i>parkin</i>  | NM_001423707.1       | GCTGCGGGTCATCTTTGCT<br>CTCCGTGAATCCGGTTTGG                         | 440 bp           | Mitophagy          |
| <i>β-actin</i> | NM_131031.2          | CTCCCCTTGTTCAATAACCTACTA<br>ATACACAGC<br>TTCTGTCCCATGCCAACCATCACTC | 185 bp           | Internal reference |

**Table S3. Mortality of zebrafish treated with different concentrations of G-PS-NPs on 48, 56, and 72 hpf**

| Concentration<br>(PS-NPs) | 0 $\mu\text{g/mL}$ | 10<br>$\mu\text{g/mL}$ | 25<br>$\mu\text{g/mL}$ | 50<br>$\mu\text{g/mL}$ | 100<br>$\mu\text{g/mL}$ | 200<br>$\mu\text{g/mL}$ |
|---------------------------|--------------------|------------------------|------------------------|------------------------|-------------------------|-------------------------|
| 48hpf                     | 0                  | 0                      | 0                      | 0                      | 0                       | 0                       |
| 56hpf                     | 0                  | 0                      | 0                      | 0                      | 0                       | 0                       |
| 72hpf                     | 0                  | 0                      | 0                      | 2.06%                  | 6.18%                   | 31.25%                  |

**Table S4. Comparative summary of previously published studies on hematological and circulatory systems toxicities**

| NP's type | Species   | Size (nm) | Concentration range              | Exposure duration | Main toxicological findings                                                     | Reference |
|-----------|-----------|-----------|----------------------------------|-------------------|---------------------------------------------------------------------------------|-----------|
| PS-NPs    | mice      | 40 nm     | 16, 40, 100 µg/day               | 1/4/12 weeks      | Cardiotoxicity<br>mitochondria damage                                           | 1         |
| PS-NPs    | mice      | 100 nm    | 10, 50, 100 µg/mL                | 30/180 days       | vascular toxicity<br>tiRNA-Glu-CTC/Cacna1f axis                                 | 2         |
| PS-NPs    | mice      | 100 nm    | 5, 10 mg/kg                      | 3 months          | Atherosclerosis<br>Oxidative stress                                             | 3         |
| PS-NPs    | mice      | 50 nm     | 25 mg/kg BW                      | 28 days           | Blood-brain barrier<br>Inhibiting Ferroptosis<br>cardiotoxicity                 | 4         |
| PS-NPs    | mice      | 100 nm    | 0.1, 0.5, 2.5 mg/day             | 6 weeks           | upregulated HIPK2<br>activated the P53 and TGF-beta                             | 5         |
| PS-NPs    | zebrafish | 80 nm     | 1, 10, 100 µg/mL                 | 7 days            | Cardiotoxicity<br>disrupting the Notch and Wnt<br>signaling pathways            | 6         |
| PS-NPs    | mice      | 80 nm     | 0, 30, 60, and 120 µg d          | 42 days           | hematopoietic damage<br>cell oxeiptosis and senescence<br>vascular malformation | 7         |
| PS-NPs    | zebrafish | 20 nm     | 2, 5, 8 mg/L                     | 22/46/70h         | interfering with<br>the VEGFA/VEGFR pathway                                     | 8         |
| PS-NPs    | mice      | 100 nm    | 100 µg/mL                        | 30/180 days       | vascular toxicity<br>regulation of the PIWI-<br>interacting RNA expression      | 9         |
| PS-NPs    | mice      | 50 nm     | 2.5, 25, 250 mg kg <sup>-1</sup> | 19 weeks          | atherosclerosis<br>upregulating MARCO                                           | 10        |

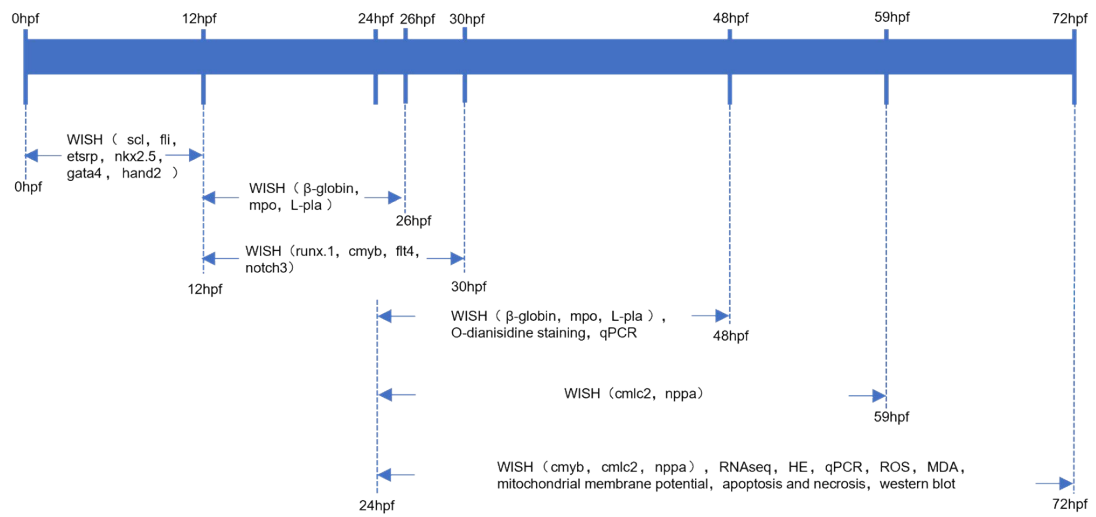

**Figure S1. The flow chart depicting the experimental design for acute exposure during embryonic stages.**

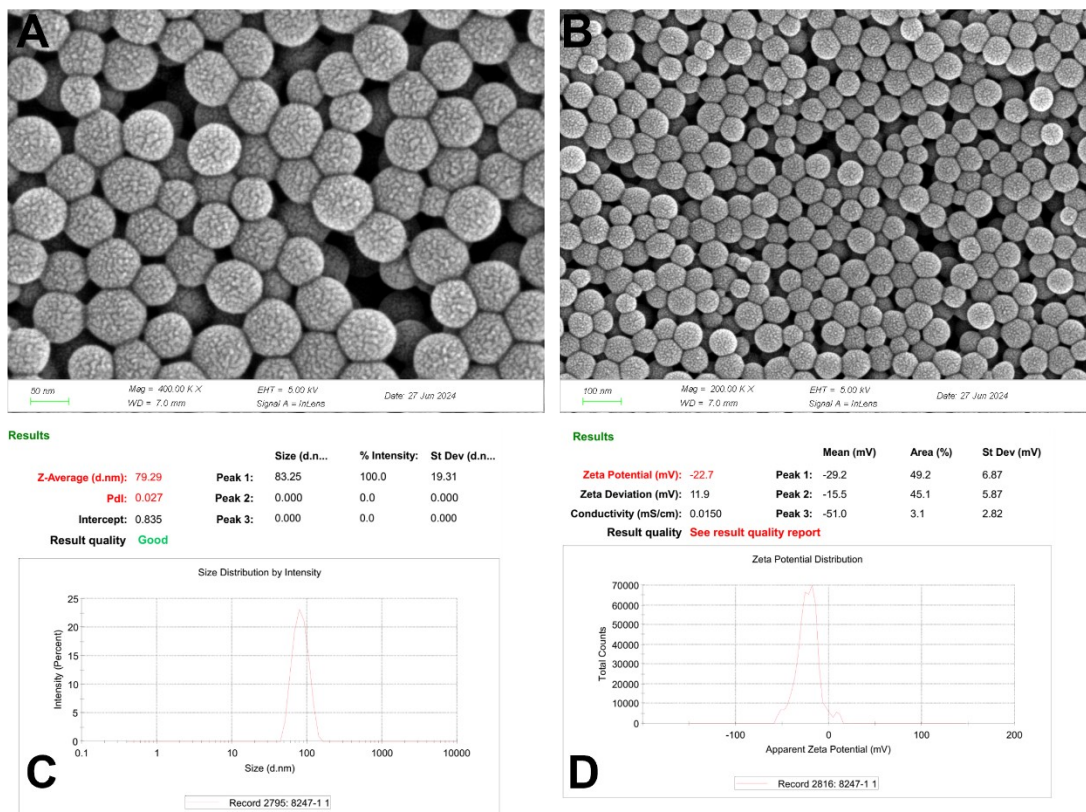

**Figure S2. The characteristics of PS-NPs.** (A-B) Morphology of PS-NPs (80 nm) was obtained by the SEM; (C) The hydrodynamic diameters of PS-NPs; (D) The zeta potential of PS-NPs.

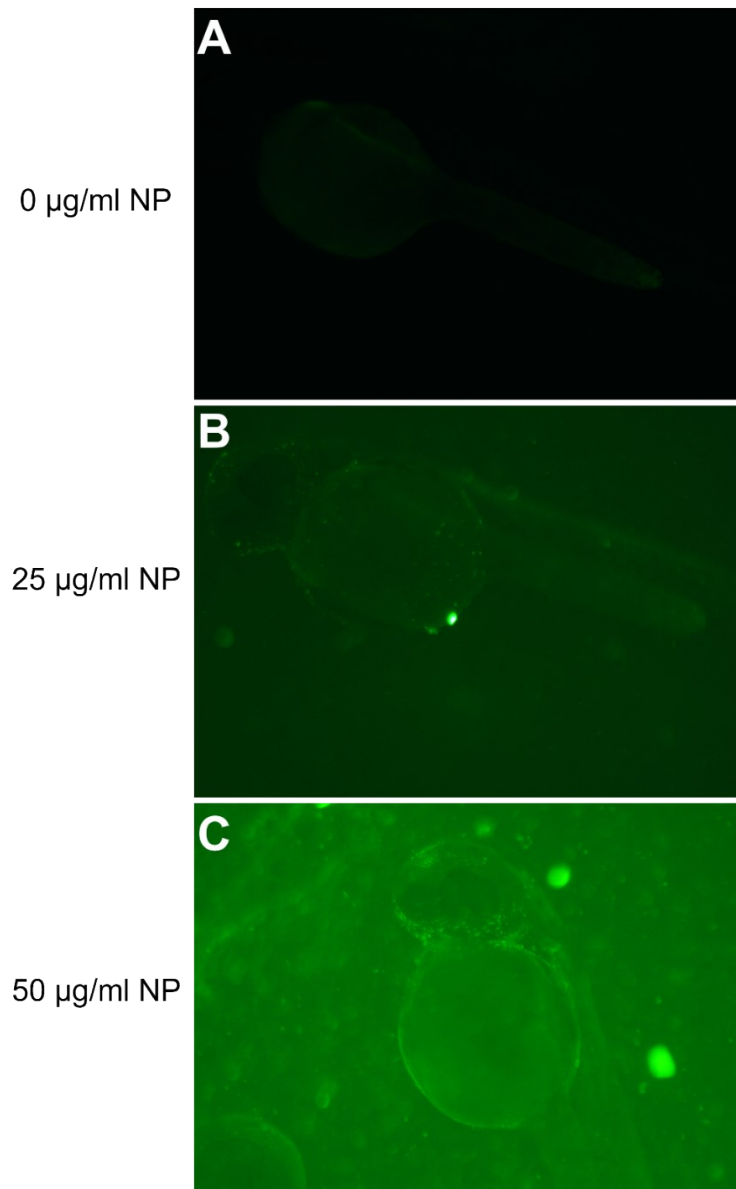

**Figure S3. The distribution of G-PS-NPs with green fluorescence (25 µg/mL and 50 µg/mL) in zebrafish at 72 hpf. (A) 0 µg/mL G-PS-NPs. (B) 25 µg/mL G-PS-NPs. (C) 50 µg/mL G-PS-NPs. Images are taken at the same exposure time.**



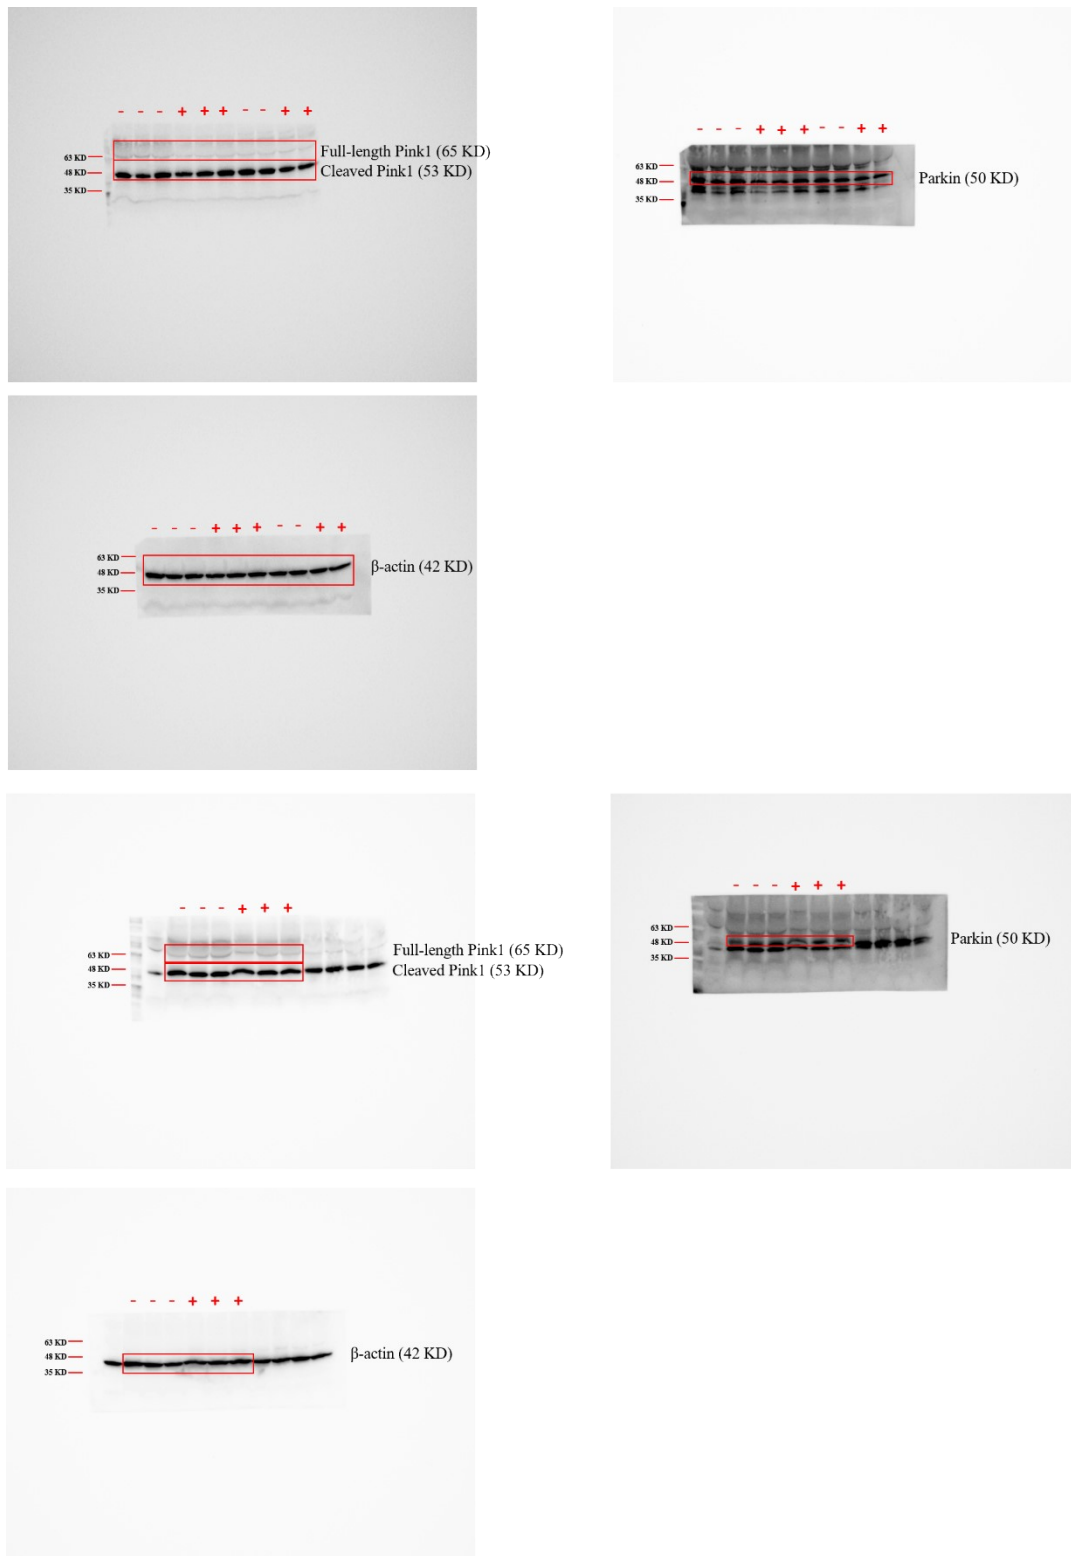

**Figure S4. The raw data of western blot.** The red box represents the target band. “-“ represents PS-NPs untreated zebrafish, and “+” represents PS-NPs treated zebrafish.

## References

1. T. Zhang, S. Yang, Y. Ge, X. Wan, Y. Zhu, F. Yang, J. Li, S. Gong, Y. Cheng, C. Hu, Z. Chen, L. Yin, Y. Pu and G. Liang, Multi-dimensional evaluation of cardiotoxicity in mice following respiratory exposure to polystyrene nanoplastics, *Part Fibre Toxicol*, 2023, **20**, 46.
2. M. Zhang, J. Shi, H. Pan, J. Zhu, X. Wang, L. Song and H. Deng, A novel tiRNA-Glu-CTC induces nanoplastics accelerated vascular smooth muscle cell phenotypic switching and vascular injury through mitochondrial damage, *Sci Total Environ*, 2024, **912**, 169515.
3. J. Wen, H. Sun, B. Yang, E. Song and Y. Song, Long-term polystyrene nanoplastic exposure disrupt hepatic lipid metabolism and cause atherosclerosis in ApoE(-/-) mice, *J Hazard Mater*, 2024, **466**, 133583.
4. C. Li, X. Chen, Z. Du, X. Geng, M. Li, X. Yang, C. Bo, Q. Jia, G. Yu and L. Shi, Inhibiting ferroptosis in brain microvascular endothelial cells: A potential strategy to mitigate polystyrene nanoplastics-induced blood-brain barrier dysfunction, *Environ Res*, 2024, **250**, 118506.
5. J. Z. Yang, K. K. Zhang, C. Hsu, L. Miao, L. J. Chen, J. L. Liu, J. H. Li, X. W. Li, J. H. Zeng, L. Chen, J. H. Li, X. L. Xie and Q. Wang, Polystyrene nanoplastics induce cardiotoxicity by upregulating HIPK2 and activating the P53 and TGF-beta1/Smad3 pathways, *J Hazard Mater*, 2024, **474**, 134823.
6. W. Liu, M. Zeng, C. Zhan, J. Wen and J. Wang, Polystyrene nanoplastics exert cardiotoxicity through the Notch and Wnt pathways in zebrafish (*Danio rerio*), *Sci Total Environ*, 2024, **934**, 173253.
7. X. Guo, C. Cheng, L. Wang, D. Li, R. Fan and X. Wei, Polystyrene nanoplastics induce haematotoxicity with cell oxeiptosis and senescence involved in C57BL/6J mice, *Environ Toxicol*, 2023, **38**, 2487-2498.
8. L. Dai, J. Luo, M. Feng, M. Wang, J. Zhang, X. Cao, X. Yang and J. Li, Nanoplastics exposure induces vascular malformation by interfering with the VEGFA/VEGFR pathway in zebrafish (*Danio rerio*), *Chemosphere*, 2023, **312**, 137360.
9. M. Zhang, J. Shi, Y. Zhu, H. Pan, L. Song and H. Deng, Polystyrene nanoplastics induce vascular stenosis via regulation of the PIWI-interacting RNA expression profile, *Environ Pollut*, 2024, **345**, 123441.
10. B. Wang, B. Liang, Y. Huang, Z. Li, B. Zhang, J. Du, R. Ye, H. Xian, Y. Deng, J. Xiu, X. Yang, S. Ichihara, G. Ichihara, Y. Zhong and Z. Huang, Long-Chain Acyl Carnitines Aggravate Polystyrene Nanoplastics-Induced Atherosclerosis by Upregulating MARCO, *Adv Sci (Weinh)*, 2023, **10**, e2205876.
